# Supplementary material for: Biotransformation of Food-Grade and Nanometric TiO2 in the Oral–Gastro–Intestinal Tract: Driving Forces and Effect on the Toxicity toward Intestinal Epithelial Cells
Source: PubMed Central journal article supplement (PMC7692287; doi:10.3390/nano10112132), 2020-10-27
Supplement: nanomaterials-10-02132-s001.pdf [file nanomaterials-10-02132-s001.pdf]

# **Biotransformation of food-grade and nanometric TiO<sub>2</sub> in the oral-gastro-intestinal tract: driving forces and effect on the toxicity toward intestinal epithelial cells**

Arianna Marucco<sup>1</sup>, Marion Prono <sup>2</sup>, David Beal<sup>2</sup>, Enrica Alasonati<sup>3</sup>, Paola Fiscaro<sup>3</sup>, Enrico Bergamaschi<sup>4</sup>, Marie Carriere<sup>2\*</sup>, and Ivana Fenoglio<sup>1\*</sup>

<sup>1</sup> Dept. of Chemistry, University of Torino, 10125-Torino, Italy

<sup>2</sup> Univ. Grenoble Alpes, CEA, CNRS, IRIG, SyMMES, Chimie Interface Biologie pour l'Environnement, la Santé et la Toxicologie (CIBEST), F-38000 Grenoble, France;

<sup>3</sup> Département Biomédicale et Chimie Inorganique, Laboratoire national de métrologie et d'essais, 75724 Paris

<sup>4</sup> Department of Public Health and Pediatrics, University of Torino, 10126 Torino, Italy;

## **Supplementary materials**

**Table S1.** Composition of simulated OGI fluids

|                                   | <b>Simulated saliva</b>                                                                                                                | <b>Simulated gastric fluid</b>                                                                                                                             | <b>Simulated intestinal fluid</b>                                                                                                                                                     |
|-----------------------------------|----------------------------------------------------------------------------------------------------------------------------------------|------------------------------------------------------------------------------------------------------------------------------------------------------------|---------------------------------------------------------------------------------------------------------------------------------------------------------------------------------------|
| <b>pH</b>                         | 6.5 ± 0.1                                                                                                                              | 1.4 ± 0.1                                                                                                                                                  | 8.1 ± 0.1                                                                                                                                                                             |
| <b>Inorganic components (g/L)</b> | KCl 0.90<br>KSCN 0.20<br>NaH <sub>2</sub> PO <sub>4</sub> x H <sub>2</sub> O 1.02<br>Na <sub>2</sub> SO <sub>4</sub> 0.57<br>NaCl 0.30 | KCl 0.82<br>NH <sub>4</sub> Cl 0.31<br>CaCl <sub>2</sub> x 2H <sub>2</sub> O 0.40<br>NaCl 2.75<br>NaH <sub>2</sub> PO <sub>4</sub> x H <sub>2</sub> O 0.31 | MgCl <sub>2</sub> x 6H <sub>2</sub> O 0.05<br>KCl 0.94<br>KH <sub>2</sub> PO <sub>4</sub> 0.08<br>NaHCO <sub>3</sub> 9.17<br>NaCl 12.27<br>CaCl <sub>2</sub> x 2H <sub>2</sub> O 0.42 |
| <b>Organic components (g/L)</b>   | Urea 0.20                                                                                                                              | Urea 0.09<br>D-Glucose 0.65<br>Glucuronic acid 0.02<br>D-Glucosamine hydrochloride 0.33                                                                    | Urea 0.35                                                                                                                                                                             |
| <b>Active components (g/L)</b>    | Mucin 0.05<br>Uric acid 0.016<br>α - amylase 0.145                                                                                     | Mucin 3<br>BSA 1<br>Pepsin 1                                                                                                                               | Pancreatin 3.00<br>Lipase 0.5<br>Bile 6.00<br>BSA 2.8                                                                                                                                 |

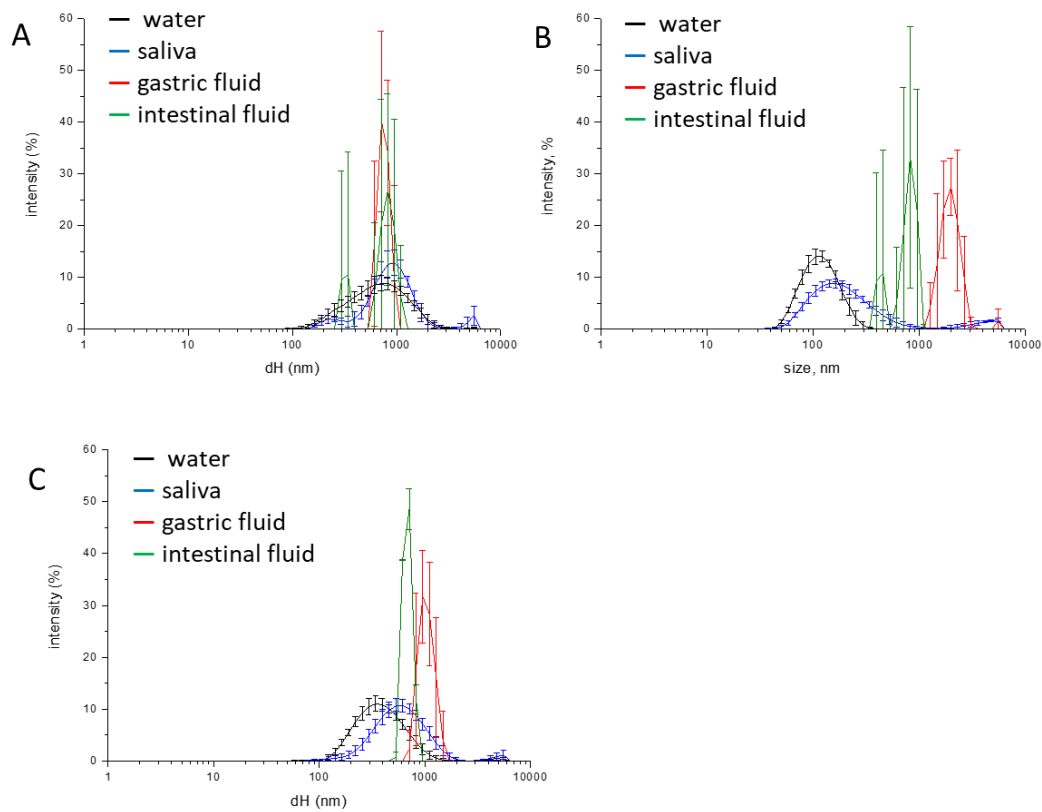

**Figure S1.** Size distribution monitored by DLS of A) TiO<sub>2</sub>-NM1; B) TiO<sub>2</sub>-NM2; C) TiO<sub>2</sub>-FG during the digestion cascade in the absence of proteins. The hydrodynamic diameters ( $d_H$ ) distribution (% intensity) is expressed as mean value of 5 measurements in three independent experiments  $\pm$  SD.

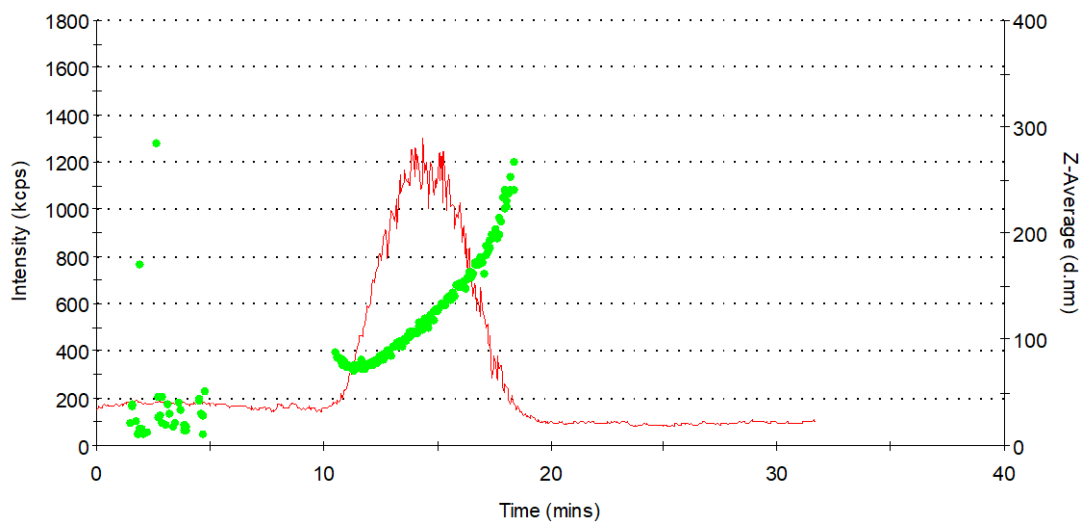

**Figure S2.** AF4/DLS fractogram of TiO<sub>2</sub>-S. Concentration of the injected suspension: 50 mg L<sup>-1</sup>. Mean diameter: 77.3 nm.

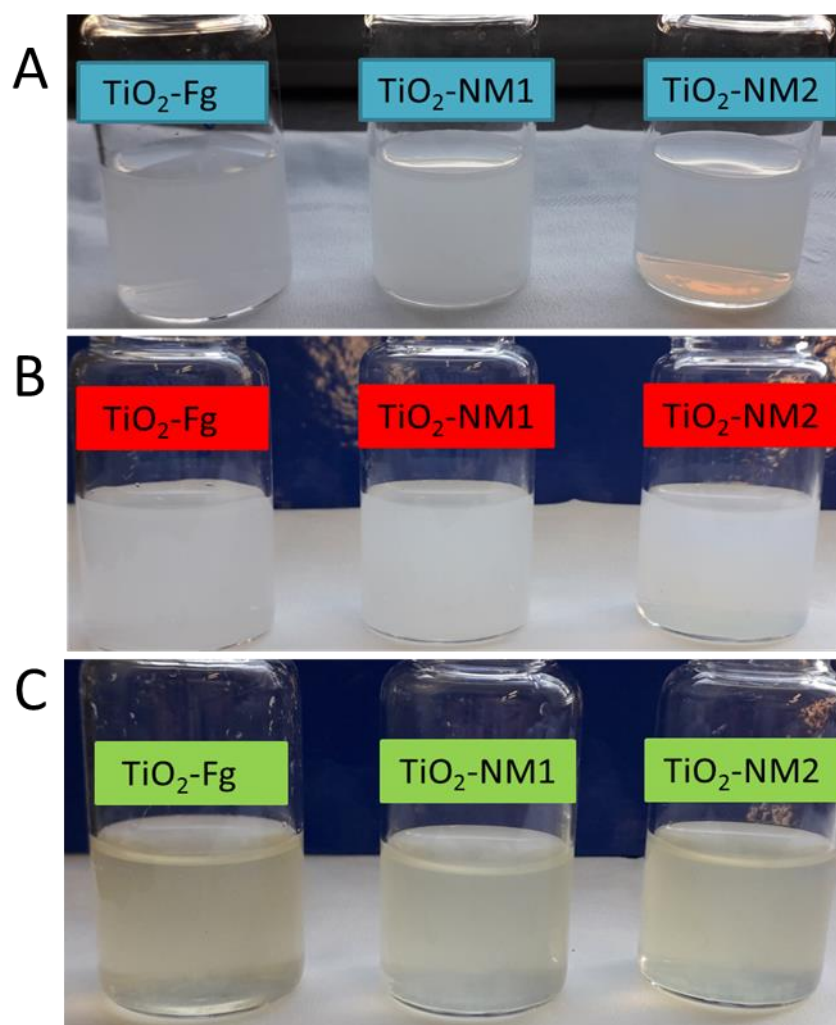

**Figure S3.** Appearance of the suspensions of the TiO<sub>2</sub> samples during the digestion cascade. A) saliva; B) gastric fluid; C) intestinal fluid.
